1  
2  
3  
4  
5  
6  
7  
8  
9  
10  
11  
12  
13  
14  
15  
16  
17  
18  
19  
20  
21  
22  
23  
24  
25  
26  
27  
28  
29  
30

**Lytic *Bacteroides uniformis* bacteriophages exhibiting host tropism congruent with diversity generating retroelement**

Stina Hedzet<sup>1</sup>, Tomaž Accetto<sup>2</sup>, Maja Rupnik<sup>1,3\*</sup>

<sup>1</sup>*National laboratory for health, environment and food, NLZOH, Maribor, Slovenia*

<sup>2</sup>*University of Ljubljana, Biotechnical faculty, Animal science department*

<sup>3</sup>*University of Maribor, Faculty of Medicine, Maribor, Slovenia*

Corresponding author\*:  
Maja Rupnik, NLZOH, [maja.rupnik@nlzoh.si](mailto:maja.rupnik@nlzoh.si)

31 **Abstract**

32 Intestinal phages are abundant and important component of gut microbiota, but our knowledge  
33 remains limited to only a few isolated and characterized representatives targeting numerically  
34 dominant gut bacteria. Here we describe isolation of human intestinal phages infecting  
35 *Bacteroides uniformis*. *Bacteroides* is one of the most common bacterial groups in the global  
36 human gut microbiota, however, to date not many *Bacteroides* specific phages are known. Phages  
37 isolated in this study belong to a novel viral genus, Bacuni, within *Siphoviridae* family and  
38 represent the first lytic phages, genomes of which encode diversity generating retroelements  
39 (DGR). This region is assumed to promote phage adaptation to the rapidly changing  
40 environmental conditions and to broaden its host range. Three isolated phages showed 99,83%  
41 genome identity but infected distinct *B. uniformis* strains. The tropism of Bacuni phages appeared  
42 to be dependent on the interplay of DGR mediated sequence variations of phage fimbrial tip  
43 proteins and mutations in host genes coding for outer-membrane proteins. We found prophages  
44 with up to 85% aa similarity to Bacuni phages in the genomes of *B. acidifaciens* and *Prevotella*  
45 sp.. Despite the abundance of *Bacteroides* within human microbiome, we found Bacuni phages  
46 only in a limited subset of published gut metagenomes.

47

48 **Importance**

49 The lack of common marker gene in viruses require a precise characterization of diverse isolated  
50 phages to enhance metagenomic analyses and to understand their role in gut microbiota. Here we  
51 report the isolation of phages representing a new genus with characteristics so far not known or  
52 rarely described in intestinal phages. They are the first lytic phages specific for *Bacteroides*  
53 *uniformis*, a bacterial representative of the prevalent genus in the gut of humans and animals.  
54 Additionally, they are the first lytic phages containing specific regions (diversity generating

55 retroelement) that putatively influence host tropism. The ability to switch constantly the targeted  
56 populations of the host species could provide an evolutionary advantage to these bacteriophages  
57 and may affect intra species diversity.

58

59

60

61 **Keywords:** gut, *Bacteroides*, virome, lytic phage, prophage, Diversity Generating Retroelement

62

63

## 64 **Introduction**

65 Intestinal viruses and their impact on human health are a neglected component of the widely  
66 studied gut microbiota. Bacteriophages (phages) exhibit different life styles and play an important  
67 role in shaping bacterial diversity and composition of the intestinal microbiota through predation  
68 and horizontal gene transfer<sup>1,2</sup>. Sequencing-based metagenomic studies have enabled insight into  
69 this complex viral reservoir revealing genetically very diverse phages<sup>1,3-5</sup>.

70 Virome metagenomic studies encounter several difficulties. The vast majority (75-99%) of  
71 sequencing reads does not correspond to any matches in the existing viral databases<sup>3</sup>. Viruses  
72 lack universal marker genes, while standardized protocols for sample preparations and analysis  
73 are not yet established<sup>1</sup>. To decipher gut virome and to connect biological characteristics with  
74 metagenomic data, cultivation of intestinal phages and their associated hosts remains crucial. A  
75 great number of intestinal phages infect anaerobic bacteria, which are challenging to cultivate;  
76 isolated and characterized phages are therefore sparse.

77 Despite these difficulties, several phages and prophages were lately described in different  
78 anaerobic gut microbiota representatives. *In silico* discovered viral clade, CrAss-like phages, is  
79 presumably present in 50% of Western individuals and can represent up to 90% of viral  
80 metagenomics reads per individual sample<sup>6,7</sup>. Prediction of suspected *Bacteroides* sp. host was  
81 confirmed by isolation of a CrAss-like phage, CrAss001, that infects *Bacteroides intestinalis* and  
82 exhibits a podovirus-like morphology<sup>8</sup>. Its life style has yet to be elucidated. CrAss-like phages  
83 are a group of genetically highly diverse phages making additional *Bacteroides* sp. or other  
84 bacteria probable hosts<sup>9</sup>. Lysogenic (temperate) phages have been identified in genomes of  
85 *Fecalibacterium prausnitzii*<sup>10</sup> and *Bacteroides dorei*<sup>11</sup>. Extremely large gut phage genomes  
86 (540 kb), named Lak phages, that presumably infect *Prevotella* sp. were also recovered from gut

87 metagenomes<sup>12</sup>. Recently, a study of temperate phage–bacteria interactions in mice gut showed  
88 that *Roseburia intestinalis* prophages influence temporal variations in composition of gut  
89 microbiota<sup>13</sup>. Additionally to *Bacteroides dorei* Hankyphage<sup>11</sup> and CrAss001<sup>8</sup>, four phages  
90 infecting different species within *Bacteroides* genus were isolated and sequenced. Phages B40-8  
91<sup>14</sup> and B124-14<sup>15</sup> infect *Bacteroides fragilis*, while phages  $\phi$ Brb01 and  $\phi$ Brb02, originating from  
92 sewage, infect *Bacteroides* sp. bacterial hosts isolated from rumen fluid<sup>16</sup>. However, compared to  
93 more than 150 phages infecting *E. coli* isolated from various biomes and clinical settings<sup>17</sup>, there  
94 are few reported bacteriophages infecting species from the genus *Bacteroides*, which account for  
95 roughly 30% of all bacteria in an average human intestine<sup>18</sup>.

96 Diversity-generating retroelements (DGRs) are genetic elements, composed of template-  
97 dependent reverse transcriptase and accessory proteins that produce mutations in targeted genes  
98 with variable repeats. This introduces the variability in the target proteins<sup>19</sup>. DGR mechanism  
99 was first described in *Bordetella* phage BPP-1, in which mutations target phage tail fiber gene via  
100 “mutagenic retrohoming” to enable bacterial host species switching<sup>20,21</sup>. Phage-encoded DGRs  
101 were also found in genomes of isolated temperate phages of intestinal *B. dorei*<sup>11</sup> and *F.*  
102 *prausnitzii*<sup>10</sup>. Moreover, DGRs were detected in defined prophage regions of bacteria belonging  
103 to *Bacteroidetes*, *Proteobacteria* and *Firmicutes*, obtained from human-gut associated  
104 metagenomes and bacterial genomes<sup>11</sup>.

105 Understanding the intestinal virome depends on the number of isolated, sequenced, and  
106 characterized bacteriophages and their associated hosts. The aim of the present study was to  
107 obtain and characterize the phages targeting abundant gut bacteria from *Bacteroides* genus, and  
108 to contribute to the insight of the “viral dark matter”<sup>22</sup> of the interactions of bacteria and viruses

109 in human gut. Additionally, the study provides bioinformatic evidence that the host range of  
110 isolated phages may very well be mediated by a DGR.

111

## 112 **Materials and methods**

### 113 *Isolation of bacterial strains from human fecal sample*

114 Fecal sample, obtained from a healthy volunteer was aliquoted and further processed or stored at  
115 -80°C. The complete isolation of bacterial strains and preparation of fecal suspension was carried  
116 out in an anaerobic workstation at 37 °C (Don Whitley Scientific).

117 Dilutions of homogenized fecal suspension (20%), made from fresh feces and pre-reduced  
118 anaerobic YBHI culture media (Brain-heart infusion media, supplemented with 0.5 % yeast  
119 extract (BioLife) and 20% of rumen fluid) were plated on YBHI agar. After 72 hours of anaerobic  
120 incubation at 37°C single colonies were randomly chosen and isolated on YBHI plates to obtain  
121 pure bacterial cultures. Isolates were identified by mass spectrometry (MALDI-TOF Biotyper  
122 System, Bruker Daltonik, Bremen, Germany). Identification of *Bacteroides* strains was confirmed  
123 by 16S rRNA gene sequencing amplified with primers 27feb to 1495revb<sup>23</sup> and analyzed with  
124 RDP Classifier<sup>24</sup>.

125 Isolated *Bacteroides* strains (Data set S1) were then used in phage screening experiment and host  
126 range experiment.

127

### 128 *Phage enrichment from sterile filtrate of homogenized fecal sample*

129 Fecal sample used for the phage isolation was not identical as used for bacterial strain isolation  
130 but was retrieved from the same healthy volunteer. Fresh fecal material (5g) was resuspended in  
131 50 mL of SM buffer with vigorous vortexing for 20 minutes. SM buffer contained 100 mM NaCl,

132 8 mM MgSO<sub>4</sub>, 50 mM Tris-Cl (1 M, pH 7.5) and 0.01% (w/v) gelatine (2%, w/v)). After cooling  
133 down on ice, fecal suspension was centrifuged twice at 5400 × g (4°C). Supernatant was filtered  
134 twice through 0.2 µm pore cellulose acetate (CA) syringe membrane filters (Filtropur, Starsted).  
135 Sterile filtrate of homogenized fecal sample (fecal water) was stored at +4°C until further use.

136 Phages were initially enriched in *Bacteroides* cultures. Ten different *Bacteroides* strains in  
137 stationary phase (1mL) were subcultured into 9 mL of liquid sABB (Anaerobe Basal Broth,  
138 Thermo Fisher Scientific, supplemented with MgSO<sub>4</sub> (0.12 mM) and CaCl<sub>2</sub> (1 mM)). For phage  
139 enrichment, 1 mL of fecal water was added to the inoculated media and incubated for 24 hours at  
140 37°C. Subsequently, 3 mL of culture media were removed and centrifuged at 5400 × g (4°C).  
141 Supernatant was syringe-filtered (0.2 µm pore, Starsted) and added to 9 mL of fresh sABB  
142 media, inoculated with *Bacteroides* strain in stationary phase like described before. The  
143 procedure was again repeated after 24 hours. The final sterile supernatant was refrigerated (4°C)  
144 until further used in double-agar-layer method. Maximal storage duration was 72 hours.

#### 145 ***Phage isolation from enrichment co-cultures with Bacteroides***

146 Spot assay on a double-agar-layer (DAL) was used for phage isolation from enrichment cultures.  
147 *Bacteroides* strains, cultivated in liquid sABB, were sampled at two different time points with  
148 optical densities OD<sub>620</sub> 0,2 (T1) and OD<sub>620</sub> 0,5 (T2) for further use in DAL assay. For each time  
149 point 10-fold dilutions were made and 200 µL of each dilution was mixed with 3 ml soft agar that  
150 was kept anaerobically at 47°C (sABB) and poured on the prereduced sABB agar basal plates.  
151 After solidification 10-fold dilutions of supernatant filtrates of phage enrichment cultures (10µL)  
152 were spotted on solidified agar. After 24 h of incubation plates were checked for potential lysis  
153 zones. The top agar with clear zones was harvested with an inoculation loop and stored in 100 µL

154 of SM puffer for 18-24 h at 4°C, followed by centrifugation (13 000 × g, 5 min). Supernatant was  
155 then used for further steps in phage purification and characterization.

156 Phages were purified from the stored spot assay supernatants by three consecutive single plaque  
157 isolation cycles using the corresponding bacterial host strain. *Bacteroides* culture (200 µL) in *log*  
158 growth phase was mixed with 10-fold dilutions of lysis zone supernatant and 2.5 mL of sABB  
159 soft agar and poured onto sABB agar basal plates, allowed to solidify, and incubated at 37°C.  
160 After 18-24h incubation, a single plaque was picked with pipette tip, transferred to SM buffer  
161 (100 µL) and left overnight at 4°C. After 18-24 h, phage lysates were centrifuged (13 000 × g, 5  
162 min) and used in a plaque assay.

### 163 ***Preparation of phage stock suspensions, EM characterization and host range***

164 Each isolated phage in SM buffer (100 µL) and 200 µL of respective host bacterial culture (10<sup>7</sup>  
165 cfu/ml) was mixed into 3 mL soft agar, poured on solid agar plate, and incubated up to 24 h at  
166 37°C. Subsequently, SM buffer (4 mL) was gently poured on confluent lyse top agar. Plates  
167 were further incubated at 37°C for 4 hours with gentle shaking. Top agar and the remains of SM  
168 buffer were scraped and centrifuged at 5400 × g (4°C). The supernatant was filtered through 0.2  
169 µm pore CA syringe membrane filters (Filtropur, Starsted). Prepared phage suspension was  
170 transferred to U-formed centrifuge tubes suitable for ultra-centrifugation (25 000 × g, 120 min,  
171 4 °C) (Beckman Coulter, Optima™ MAX-XP). Pellets were resuspended in 200 µL of SM buffer  
172 and phage stock suspensions were stored at 4°C and -80°C.

173 Transmission electron microscopy was performed at National institute for biology, Ljubljana,  
174 Slovenia).



175 Host range of isolated phages was tested with the double-agar-layer assays using 12 *Bacteroides*  
176 strains belonging to four species (Data set S1).

### 177 *Lysogen formation assay*

178 Each isolated phage was cultivated with its respective host strain. Plates with formed plaques in  
179 plaque assay were incubated in anaerobic chamber at 37°C for additional 72 hours, to allow the  
180 growth of potential lysogenic strains. From the plaques formed on double-layer agar, bacterial  
181 cultures were isolated with a sterile needle or small pipette tip and inoculated on sABB agar  
182 plates to obtain pure cultures. At least 12 strains were isolated per tested bacteriophage.  
183 Sensitivity of obtained strains for isolated phages was tested with DAL spot assay described  
184 above (Figure S4).

### 185 *Phage and bacterial genome sequencing*

186 Phage lysate (200 µL) with app. 10<sup>9</sup> pfu/ml was treated with DNase I (Sigma Aldrich) at the final  
187 concentration of 0.02 mg/ml and 0.05 mg/mL RNase A (Sigma Aldrich) and incubated for 2h at  
188 37°C, followed by 10 min heat inactivation at 90°C. Potential presence of host genomic residues  
189 was assayed with PCR using primers targeting 16S rRNA gene<sup>23</sup>. Phage DNA was extracted  
190 with RTP<sup>®</sup> DNA/RNA Virus Mini Kit following manufacturer's instructions (INVITEK  
191 Molecular).

192 *Bacteroides* DNA was extracted (QIAamp DNA Mini Kit, Qiagen).

193 For phage and bacterial genomes paired-end libraries were generated using the Nextera XT  
194 Library preparation kit (Illumina) and sequenced on MiSeq (Illumina) with 600-cycle MiSeq  
195 ReagentKit v3.

196 The quality of the raw sequencing reads was examined by FastQC tool Version 0.11.9 (Babraham  
197 Bioinformatics) <sup>25</sup>. Quality trimming was done by Trimmomatic Version 0.39  
198 (USADDELLAB.org) <sup>26</sup> and overlapping paired-end reads were merged by using FLASH  
199 software, version 1.2.11 (CBB) <sup>27</sup>. Assembly was performed by SPAdes Assembler, version  
200 3.14.0 <sup>28</sup> and the assemblies were examined using Quast version 4.0 <sup>29</sup>. Genomes were then  
201 annotated with Prokka 1.14.5 <sup>30</sup>.

### 202 ***Bacteriophage genome annotation***

203 Protein sequences of open reading frames (ORFs), determined with Prokka 1.14.5 <sup>30</sup>, were  
204 blasted (blastp, NCBI, 2019) against non-redundant protein sequences (nr) database. Conserved  
205 protein domains of ORF were predicted with Conserved Domain Search (CDD, NCBI) and Pfam  
206 <sup>31</sup>. Additionally, remote homologues were also detected using PHYRE2 – Protein  
207 Homology/analogY Recognition Engine V 2.0 <sup>32</sup>. Presence of signal peptides was analyzed with  
208 SignalP-5.0 Server <sup>33</sup>. Remote homologs of phage head-neck-tail module proteins were  
209 additionally analyzed on VIRFAM sever <sup>34</sup>. Predicted DGR regions were analyzed with myDGR,  
210 a server for identification and characterization of diversity-generating retroelements <sup>35</sup>.

### 211 ***Phage classification and phylogenetic analysis***

212 Phage life style and classification was computationally analyzed using PHACTS program  
213 (<http://www.phantome.org/PHACTS/index.htm>) <sup>36</sup>.

214 vConTACT2 <sup>37</sup> was used for taxonomic classification using the ViralRefSeq-prokaryotes-v94  
215 database. To determine phage DNA packaging and replication strategy, a phylogenetic analysis  
216 of amino acid sequences of TerL – terminase large subunit was made. Sequences of TerL were  
217 downloaded from NCBI and Pfam databases and aligned using the ClustalW <sup>38</sup> program.

218 Phylogenetic tree was then generated with the SeaView Version 5.0.2<sup>39</sup> integrated phyML using  
219 the maximum likelihood approach and GTR nucleotide substitution model. The resulting  
220 dendrogram was then visualized with FigTree v1.4.4 (<http://tree.bio.ed.ac.uk/software/figtree/>).

221

### 222 ***Identification of shared homologous proteins and prophage regions***

223 Based on closest BLASTp hits of determined ORFs, closest relatives were manually predicted  
224 and their bacterial host genomes were examined for prophage presence. Ranges of prophage  
225 regions were determined based on the G+C content, predicted functional annotations of  
226 neighboring genes, presence of integrase and other phage specific genes or identification of  
227 repeats sites (attL and attR). Sequences of predicted prophage regions were extracted from host  
228 genomes using Artemis software version 1.8<sup>40</sup>, annotated with Prokka 1.14.5<sup>30</sup> and applied in  
229 comparison using Easyfig<sup>41</sup>. Protein sequences of ORFs of identified prophages were analyzed  
230 for conserved protein domains like described above. Gene synteny in different phage functional  
231 gene groups was analyzed.

### 232 ***SNP analysis of potential phage target genes***

233 Reads of original phage host (*B. uniformis* MB18-80) and two derivative strains isolated in  
234 lysogeny experiment (MB18-80-K and MB18-80-PH) were mapped to original MB18-80  
235 assembly using BBTools<sup>42</sup>. Sorted BAM files were used for calling SNPs sites using the  
236 SAMtools version 0.1.19<sup>43</sup>. Mapped reads and SNP sites were also analyzed relative to MB18-80  
237 genome using Artemis software version 1.8<sup>40</sup>.

### 238 ***Tandem repeats analysis with direct sequencing***

239 Tandem repeats were located and analyzed with Tandem Repeats Finder<sup>44</sup>. Primers (primer F2,  
240 5'-CCTCGGTAATGCTTTCTACG-3'; primer R2, 5'-AGGTAGCCGTAATGTATCG-3') were  
241 constructed using SnapGene software (GSL Biotech LLC, 2004) and were used in a direct Sanger  
242 sequencing reaction (40 cycles; using a gDNA as a template and BigDye Terminator v3.1 Cycle  
243 Sequencing Kit) to examine if the repeats represent phage genome termini of linear dsDNA  
244 phage. Sequencing was performed on 3500 Series Genetic Analyzer (ThermoFisher Scientific)  
245 and analyzed with Artemis software version 1.8<sup>40</sup>

#### 246 *Metagenomic analysis*

247 Paired-end sequencing reads in fastq format of metagenomics studies under the BioProject  
248 accession numbers PRJNA491626, PRJNA268964 and PRJNA278393 were downloaded from  
249 The European Nucleotide Archive (ENA) (<https://www.ebi.ac.uk/ena>). Adaptor removal and  
250 quality trimming was conducted by Trimmomatic Version 0.39 (USADDELLAB.org)<sup>26</sup>. Processed  
251 metagenomics reads were mapped to genome assembly of isolated phage using BBTools<sup>42</sup>.

252

#### 253 *Data availability*

254 The assembled genomes were submitted to the NCBI (<https://www.ncbi.nlm.nih.gov/>) under the  
255 Bioproject accession numbers PRJNA636979 (bacterial genomes) and PRJNA638235 (phage  
256 genomes).

257

## 258 **Results**

### 259 *Isolation and phenotypic characterization of phages specific for Bacteroides uniformis*

260 In 8 out of 12 *Bacteroides* strains belonging to four species the lysis like zones were observed.  
261 Subsequently, plaques were successfully propagated from two *B. uniformis* strains (Data set S1).  
262 Circular plaques were formed with diameter ranging from 0.1 to 3 mm (Figure 1, B). Four  
263 seemingly different bacteriophages were isolated (F1-F4). Phages were stable if stored at 4°C or -  
264 80°C, at high concentration ( $10^{11}$  pfu/ml). Subsequent analysis showed that phages F3 and F4  
265 were genetically identical and thus for further experiments only phages F1, F2 and F4 were used.  
266 Host range was tested on all *Bacteroides* strains included in this study (Data set S1). In addition  
267 to the initially identified *B. uniformis* host strains, lysis like forms (Figure 1, C) were observed  
268 with additional representatives of *B. vulgatus*, *B. uniformis*, and *B. ovatus*, although we were not  
269 able to further propagate the phages.

270 Attempts to isolate potential lysogenic *Bacteroides* strains from the formed plaques were not  
271 successful. Only 10 out of 35 inoculated plates resulted in bacterial growth. These strains were  
272 further tested for susceptibility to infection with obtained phages. Experiment was performed  
273 three times and no lysogens were detected (discussed in detail below).

274 Transmission electron microscopy (TEM) analysis showed morphology typical of the  
275 *Siphoviridae* family of the *Caudovirales* with icosahedral heads of about 50 nm in diameter and  
276 approximate tail size of 150x8 nm (Figure 1, A).

277 ***Novel B. uniformis phages show high degree of similarity to each other and belong to a new***  
278 ***genus***

279 The assembled genome lengths of phages F1, F2 and F4 were from 40421 to 40653 bp (Table 1).  
280 G+C content of phage genome content was 51.8 mol % (F1), which is considerably higher than  
281 its host genome G+C content (46.3 mol %), obtained from WGS analysis, which is also  
282 consistent with *Bacteroides uniformis* reference strain G+C content<sup>44</sup>.

283 All four isolated phages were similar one to another (99.83 % similarity) (Table 1). Genomes of  
284 phage F1 and F4 differ only in 24 SNP sites, of which 18 are condensed in variable repeat region  
285 1 (VR 1) of DGR and the phages infect different hosts. Phage F2 shares the same host with phage  
286 F1 but deviates from F1 in an insertion of 19 aa in putative reverse transcriptase gene of the DGR  
287 and in 16 SNPs in variable repeat regions (VR) of the DGR.

288 The isolated phages could not be assigned to any of the known prokaryotic viral clusters using a  
289 gene sharing network approach vConTACT2<sup>37</sup>, implying that so far no similar bacteriophages  
290 have been reported (Data set S2 (A) and Figure S1 (B)). Based on no resemblance with phage  
291 genera described to date, phages F1, F2 and F4 were classified as a new genus, and for the  
292 purpose of this paper provisionally named Bacuni.

293 TEM based classification of Bacuni phages into *Siphoviridae* family was additionally confirmed  
294 *in silico* using Virfam server<sup>34</sup>, which identifies proteins of the phage head-neck-tail module and  
295 assigns phages to the most closely related cluster of phages within the ACLAME<sup>45</sup> database  
296 (Figure S2).

### 297 ***Genome organization of novel B. uniformis phages***

298 Using automated annotation, 51 open reading frames (ORFs) were predicted in Bacuni genomes.  
299 Further functional annotation lead to a prediction of potential functions of 34 genes, which could  
300 be divided in five common phage functional groups (Figure 2 and Data set S3).

301 Tandem nucleotide repeats were identified in Bacuni phage ORF for putative phage tail tape  
302 measure protein and direct sequencing was conducted to examine whether repeats in phage  
303 genome are terminal, which was not the case. Phylogenetic analysis of large terminase subunit  
304 genes (TerL) (Figure S3) indicated that Bacuni phages use rolling circle-concatemer genome

305 replication due to clustering into the group of phages with cohesive ends and 3'-single-strand  
306 extensions.

307 Nine putative structural proteins were identified, including the major capsid protein, prohead  
308 protease, and a large phage tail tape measure protein with observed tandem repeats typical for  
309 these proteins <sup>46</sup> and four transmembrane helices. Large and small subunit of the terminase and  
310 portal protein, which together form a packaging function group, were found located in the close  
311 proximity of the structural genes. Bacterial cell wall hydrolytic enzyme, a predicted  
312 acetylmuramoyl-L-alanine amidase, was identified as a putative lysin.

313 Based on conserved domain search, twelve identified phage genes are putatively involved in  
314 DNA metabolism and replication. Additionally, two genes primarily identified as Domains of  
315 unknown function (DUF2800 and DUF2815) were recently assigned new putative roles by  
316 bioinformatic approach <sup>47</sup>. They are likely to be involved in regulation of phage DNA  
317 metabolism. DUF2815 hypothetically functions as single-stranded DNA and DUF2800 as a cis-  
318 regulatory elements or small RNA in phages <sup>47</sup>.

319 Finally, four functionally annotated genes belong to diversity-generating retroelement (DGR).

### 320 ***DGR variability and host tropism***

321 Diversity-generating retroelements are recently described genetic elements that use reverse  
322 transcription from a donor template repeat (TR) to a recipient variable repeat (VR) in defined  
323 target gene. This generates vast numbers of sequence variants (substitutions) in specific target  
324 genes <sup>10</sup>.

325 VR sequences of Bacuni phages are located on genes whose products exhibit DUF1566 and/or  
326 Fib\_succ\_major motifs. The Legionella DGR exemplifies the closest studied DGR <sup>19,48</sup>. DGRs

327 found in Bacuni phages belong to a group operating on targets exhibiting a C-type lectin fold <sup>19</sup>.  
328 This classification and the presence of DGR elements in Bacuni phages were also confirmed with  
329 MyDGR, a server for identification and characterization of diversity-generating retroelements <sup>35</sup>.  
330 Bacuni phages have two target genes putatively diversified by DGR. First target gene (with  
331 detected VR 2) is located on a distant part of the phage F1 genome (6947-7054 bp) while the  
332 second target gene with VR 1 (20281-20388 bp) is found in the immediate neighborhood of the  
333 core DGR components including reverse transcriptase (RT) (18141-19544 bp), Avd-accessory  
334 protein (19814-20197 bp), and the TR containing gene (19577-19684 bp). The variable repeat  
335 gene region, which is diversified, lies at the 3' end of target genes and codes for the last 35 amino  
336 acids. Both variable repeats were found at 3' end of the target gene with DUF1566 domain,  
337 where also almost all genetic differences between Bacuni phages are located (Table 1, Figure 3).  
338 Bacuni phages F1 and F4 differ in 13 amino acids in this region. Target genes in Bacuni phage  
339 genomes were found in ORFs that include motifs for cellular adhesion and represent a putative  
340 fimbrial tip protein. Identified target genes exhibit high similarity with 60 % or higher coverage  
341 (Phyre2) to crystal structure of a fimbrial tip protein (bacova\_04982) from *Bacteroides ovatus*  
342 atcc 8483 <sup>49,50</sup> that was also identified as a DGR target in metagenomes of human stool samples <sup>49</sup>  
343 .  
344 The observed TR-VR substitutions can be seen in Figure 3 and are, as expected, mutations in  
345 adenines. They are most probably the results of induced substitutions mediated by RT (Figure 3).  
346 Despite high genetic similarity, isolated Bacuni phages exhibit different host range (Table 1).  
347 Since the vast majority of genetic differences was concentrated in VR regions of DGR target  
348 genes located in putative fimbrial tip proteins, we propose that DGRs influence host range of  
349 Bacuni phages.



350 ***Bacuniphage similarities with other phages and prophages of various anaerobic bacteria***

351 As described above, searches against the NCBI non-redundant database and the Reference Viral  
352 Database <sup>51</sup> showed no similarities of Bacuni phages to any known phages at the nucleotide  
353 level. BLASTp search, however, revealed some homology to prophage-related gene products  
354 encoded in the genomes within the order *Bacteroidales* (Table 2; Figure 4).

355 Six putative prophage regions were identified in assembled bacterial genomes with reliable  
356 homologies (Table 2; Figure 4).

357 Some of the identified prophage regions were found on contig borders and some assemblies were  
358 highly fractioned, thus some parts of prophage genomes could have been left out. The putative  
359 functions of retained prophage ORFs were assigned based on conserved protein domains found  
360 (Data set S4). The identified putative prophage regions have not been described before.

361 The highest homology (up to 85% amino acid similarity) to proteins of Bacuni phages was  
362 observed in putative prophage regions of *B. acidifaciens* NM70\_E10 and *Prevotella* sp. P3-122  
363 (Figure 4). They share significant protein homology between two thirds of annotated proteins of  
364 various functional clusters including the DGR region and its target region overlapping DUF1566  
365 domain. However, no homologies were found in its putative lysin and recombinase genes.

366 Protein level homologies found in remaining identified putative prophage regions of *Prevotella*  
367 sp. OH937\_COT-195, *Porphyromonas gingivicanis* COT-022 OH1391, *P. cangingivalis* JCM  
368 15983 and *Prevotella timonensis* UMB0818 were mostly present in structural and packaging  
369 functional gene groups (Figure 4).

370 The prevalence of predicted prophage regions identified in initial screening (Table 2) was further  
371 examined in Genbank nr-database. Minor nucleotide level similarities of the predicted prophage

372 regions were found, with a few exceptions. Nucleotide homology (92%) on 30% of putative *B.*  
373 *acidifaciens* NM70\_E10 prophage region length was found in genomes of *B. ovatus* 3725 D1  
374 (CP041395.1), *Bacteroides xylanisolvens* strain H207 (CP041230.1), and in unidentified phage  
375 clone 1013 (JQ680349.1).

376 Whole sequence of predicted *P. cangingivalis* JCM 15983 prophage was also found in the  
377 genome of *P. cangingivalis* ATCC 700135 isolated in Finland and in *P. cangingivalis*  
378 NCTC12856 collected in 1986 and isolated from fecal sample of *Homo sapiens*.

### 379 ***Identification of Bacuni phages in Human gut virome database and in associated*** 380 ***metagenomes***

381 Genome of Bacuni phage F1 was blasted (blastn) against Human gut virome database (GVD), a  
382 novel database composed of 13,203 unique viral populations obtained from gut metagenomes of  
383 572 individuals from different geographical locations<sup>52</sup>. Matches (roughly 80% nucleotide  
384 similarity over more than 80% of the Bacuni phages) were found in contigs originating from two  
385 studies<sup>53,54</sup>. Data was further tracked to authentic metagenomics data sets that include  
386 metagenomes from Western urban societies and traditional communities<sup>53,54</sup>. Search for reads  
387 mapping to Bacuni phage genome revealed that Bacuni phages were underrepresented in Western  
388 data sets analyzed, but present in data sets of fecal viromes of Cameroonians with gastroenteritis  
389 (Data set S5). Up to 6066 reads from metavirome of a Cameroonian<sup>54</sup> were found to align to  
390 Bacuni phage, majority originating from the Kumba region (Data set S5). Further analysis  
391 showed that those reads cover 31 of the 40 kb Bacuni phage F1 genome.

392

### 393 ***Changes of host susceptibility pattern after exposure to Bacuni phage***

394 Assay for detection of lysogenic bacteriophage in *B. uniformis* host strains was conducted (Data  
395 set S1, Figure S4). Three attempts to isolate potential lysogenic host strains from the formed  
396 plaques resulted each in roughly 10 viable derivatives of *B. uniformis* MB18-80 and *B. uniformis*  
397 MB18-33. These derivative strains were retested with all three Bacuni phages. Spot assay showed  
398 mixed results: some derivatives were indeed not lysed by any of the phages (representing  
399 possible lysogens), while some were resistant to challenging phages but lysed by phages that  
400 initially did not lyse the original strain. Thus, this was not a simple lysogenization.

401 Two derivatives of *B. uniformis* MB18-80, host of phage F4, were further selected for WGS:  
402 MB18-80-K, a potential lysogen, that was resistant to infection with all tested phages, and second  
403 derivative MB18-80-PH that became susceptible to infection with phages F1 and F2, but resistant  
404 to F4 (Data set S1, Figure S4).

405 Genome analysis of *B. uniformis* MB18-80-K and *B. uniformis* MB18-80-PH disproved  
406 assumptions of lysogenic lifestyle since no parts of Bacuni phage genome were detected in  
407 genome of sequenced derivative strains. These results were in agreement with the predicted lytic  
408 life style of isolated phages with Phage classification tool set (PHACTS)<sup>36</sup>.

409 Comparison of the obtained *B. uniformis* derivative genomes to original host strain indicated  
410 SNPs in several biologically relevant genes (Table 3, Data set S6). Genome of immune derivative  
411 *B. uniformis* MB18-80-K exhibits SNPs in genes coding for putative restriction enzymes  
412 involved in defense mechanism against invading viruses and in outer membrane transporter  
413 complexes most likely involved in import of large degradation products of proteins or  
414 carbohydrates (Table 3, Data set S6). *B. uniformis* MB18-80-PH, in which phage tropism  
415 switching was observed, exhibited SNPs in partially overlapping set of genes coding for

416 restriction enzymes, putative porins, peptidoglycan binding proteins, and putative peptidoglycan  
417 hydrolase (Table 3, Data set S6).

418

## 419 **Discussion**

420 *Bacteroides* is one of the most prominent bacterial genera of the human gut microbiome and is  
421 known as dietary fiber fermenter that produces short chain fatty acids important for host health  
422 <sup>55,56</sup>. As such it is commonly found in globally conserved core gut microbiota <sup>57-60</sup>.

423 In this study, we describe isolation and characterization of human gut associated phages infecting  
424 *B. uniformis*. As they were essentially not similar to any of the hitherto described phages based  
425 on their encoded proteins, we were not able to classify them using VconTACT2. Thus, they may  
426 be the first isolated representatives of a new phage genus, provisionally named here a “Bacuni  
427 phage”.

428 Three isolated phages infected distinct *B. uniformis* strains. The tropism of Bacuni phages  
429 appears to be dependent on interplay of DGR mediated sequence variations of phage fimbrial tip  
430 proteins and mutations in host genes coding for outer-membrane proteins. Different host range  
431 between genetically very similar Bacuni phages can be explained with SNPs sites condensed in  
432 variable repeat of DGR region, located in a putative fimbrial tip protein, a gene presumably  
433 involved in cell adhesion and possibly acting as a cell receptor in Bacuni phages. The SNPs are at  
434 the C-terminus of two target proteins, at variable repeats that each consist of 35 amino acids.  
435 Bacuni phages F1 and F4 differ in 13 amino acids at the variable repeat 2 coded fimbrial protein  
436 tip end and infect different hosts, while Bacuniphages F1 and F2, that infect the same host, differ  
437 in variable repeat 1 far removed from the DGR region. Given that there are only 6 more SNPs

438 observed between F1 and F4 outside of DGR, one may conclude that variable repeat 2, located in  
439 close proximity of reverse transcriptase, presumably plays a decisive role in Bacuni phage  
440 tropism in our experimental setting. These findings correlate with study where metagenomics  
441 data set from Human microbiome project (HMP) was screened for DGRs<sup>50</sup>. There, the identified  
442 variable regions were also localized in a DUF1566 domain coding genes and the target protein  
443 showed high protein homology to a pilin tip from *Bacteroides ovatus*<sup>11,49</sup>.

444 It appears that DGR contributes to increased adaptability of temperate and lytic phages in such  
445 complex communities as the human gut, where multiple species of the same genus and several  
446 strains of the same species may coexist. This evolutionary advantage may (indirectly) affect  
447 microbial diversity and influence health of the associated mammalian host.

448 To the best of our knowledge, Bacuni phages represent the first DGR-containing lytic phages<sup>11</sup>.  
449 Based on protein homologies to here described six putative prophages (Figure 4, Table 2) and  
450 their paucity in virome studies, it is plausible that Bacuni phages originate from temperate  
451 phages.

452 Viral databases do not contain many genomes of phages infecting dominant gut bacteria and we  
453 were initially not able to locate a metagenome/virome that contained sequence reads mapping to  
454 Bacuni phages. However, recently published GVD database improves viral detection rates over  
455 NCBI viral RefSeq by nearly 60-fold<sup>52</sup>. Almost complete Bacuni phage genome was found in  
456 GVD originating from intestinal viromes of Cameroonians<sup>54</sup>. Weak signal of reads in  
457 metagenomes of traditional Peruvian communities and urban Italian gut metagenomes<sup>53</sup> may  
458 indicate that these phages are present at various geographic locations but not abundant enough to  
459 be detected with common metagenomics sequencing technologies that are generally not yet  
460 optimized to detect bacterial viruses.

461 Our study sheds light on feasibility of isolation of lytic phages infecting abundant gut bacteria.  
462 Lytic phages are suitable for use in phage therapy<sup>61–64</sup>. In vivo studies in mice using commercial  
463 phage cocktails showed that phages triggered a cascade reaction that influenced bacterial  
464 diversity and composition<sup>65</sup>. Additional further research may provide phages targeting less  
465 beneficial bacteria in the intestine with potential therapeutic role on human gut microbiota.

466 In summary, phages described in this study represent a new genus, are the first example of  
467 phages using *B. uniformis* as a host, are one of the rare lytic phages isolated from the gut  
468 ecosystem and are the first lytic phages with DGR sequences. Single nucleotide variation in  
469 phage DGRs and in the relevant host proteins are described in the context of host specificity  
470 pattern changes.

471

#### 472 **Acknowledgements.**

473 Authors would like to thank Magda Tusek Znidaric for performing TEM.

474

#### 475 **Disclosure of potential conflicts of interest**

476 Authors report no potential conflicts of interest.

#### 477 **Funding details**

478 This work was supported by the Slovenian Research Agency under Grant P3-0387 and Slovenian  
479 Research Agency Young Investigators Grant (SH).

480

## 481 References

- 482 1. Sausset R, Petit MA, Gaboriau-Routhiau V, De Paepe M. New insights into intestinal phages.  
483 *Mucosal Immunol.* 2020;13(2):205-215. doi:10.1038/s41385-019-0250-5
- 484 2. Sordi L De, Lourenço M, Debarbieux L. “ I will survive ”: A tale of bacteriophage-bacteria  
485 coevolution in the gut. *Gut Microbes.* 2019;10(1):92-99. doi:10.1080/19490976.2018.1474322
- 486 3. Aggarwala V, Liang G, Bushman FD. Viral communities of the human gut : metagenomic analysis  
487 of composition and dynamics. 2017:1-10. doi:10.1186/s13100-017-0095-y
- 488 4. Minot S, Sinha R, Chen J, et al. The human gut virome : Inter-individual variation and dynamic  
489 response to diet The human gut virome : Inter-individual variation and dynamic response to diet.  
490 2011:1616-1625. doi:10.1101/gr.122705.111
- 491 5. Minot S, Bryson A. Rapid evolution of the human gut virome. *Proc ....* 2013;110(30):12450-  
492 12455. doi:10.1073/pnas.1300833110//
- 493 6. Dutilh BE, Cassman N, McNair K, et al. A highly abundant bacteriophage discovered in the  
494 unknown sequences of human faecal metagenomes. *Nat Commun.* 2014;5:1-11.  
495 doi:10.1038/ncomms5498
- 496 7. Guerin E, Shkoporov A, Stockdale SR, et al. Biology and Taxonomy of crAss-like Bacteriophages,  
497 the Most Abundant Virus in the Human Gut. *Cell Host Microbe.* 2018;24(5):653-664.e6.  
498 doi:10.1016/j.chom.2018.10.002
- 499 8. Shkoporov AN, Khokhlova E V, Fitzgerald CB, et al. ΦCrAss001 represents the most abundant  
500 bacteriophage family in the human gut and infects *Bacteroides intestinalis*. *Nat Commun.*  
501 2018;9(1):4781. doi:10.1038/s41467-018-07225-7
- 502 9. Andrew J. Hryckowian, Bryan D. Merrill, Nathan T. Porter W Van, Treuren, Eric J. Nelson,  
503 Rebecca A. Garlena, Daniel A. Russell EC, Martens JLS. *Bacteroides thetaiotaomicron*-infecting  
504 bacteriophage isolates inform sequence- based host range predictions. *preprint.* 2020.  
505 doi:10.32388/nqwmca
- 506 10. Cornuault JK, Petit M, Mariadassou M, et al. Phages infecting *Faecalibacterium prausnitzii* belong  
507 to novel viral genera that help to decipher intestinal viromes. 2018:1-14.
- 508 11. Benler S, Cobián-Güemes AG, McNair K, et al. A diversity-generating retroelement encoded by a  
509 globally ubiquitous *Bacteroides* phage 06 Biological Sciences 0605 Microbiology. *Microbiome.*  
510 2018;6(1):1-10. doi:10.1186/s40168-018-0573-6
- 511 12. Devoto AE, Santini JM, Olm MR, et al. Megaphages infect *Prevotella* and variants are widespread  
512 in gut microbiomes. *Nat Microbiol.* 2019;4(4):693-700. doi:10.1038/s41564-018-0338-9
- 513 13. Cornuault JK, Moncaut E, Loux V, et al. The enemy from within: a prophage of  
514 <em>Roseburia intestinalis</em> systematically turns lytic in the mouse gut, driving  
515 bacterial adaptation by CRISPR spacer acquisition. *bioRxiv.* January 2019:575076.  
516 doi:10.1101/575076
- 517 14. Hawkins SA, Layton AC, Ripp S, Williams D, Sayler GS. Genome sequence of the *Bacteroides*  
518 *fragilis* phage ATCC 51477-B1. *Viol J.* 2008;5(Figure 1):1-5. doi:10.1186/1743-422X-5-97
- 519 15. Ogilvie LA, Caplin J, Dedi C, et al. Comparative (meta)genomic analysis and ecological profiling  
520 of human gut-specific bacteriophage φB124-14. *PLoS One.* 2012;7(4):1-17.  
521 doi:10.1371/journal.pone.0035053

- 522 16. Gilbert RA, Kelly WJ, Altermann E, et al. Toward understanding phage: Host interactions in the  
523 rumen; complete genome sequences of lytic phages infecting rumen bacteria. *Front Microbiol.*  
524 2017;8(DEC):1-17. doi:10.3389/fmicb.2017.02340
- 525 17. Pacífico C, Hilbert M, Sofka D, et al. Natural occurrence of Escherichia coli-infecting  
526 bacteriophages in clinical samples. *Front Microbiol.* 2019;10(OCT):1-18.  
527 doi:10.3389/fmicb.2019.02484
- 528 18. Sears CL. A dynamic partnership: Celebrating our gut flora. *Anaerobe.* 2005;11(5):247-251.  
529 doi:10.1016/j.anaerobe.2005.05.001
- 530 19. Wu L, Gingery M, Abebe M, et al. Diversity-generating retroelements: Natural variation,  
531 classification and evolution inferred from a large-scale genomic survey. *Nucleic Acids Res.*  
532 2018;46(1):11-24. doi:10.1093/nar/gkx1150
- 533 20. Liu M, Deora R, Doulatov SR, et al. Reverse transcriptase-mediated tropism switching in  
534 Bordetella bacteriophage. *Science (80- ).* 2002;295(5562):2091-2094.  
535 doi:10.1126/science.1067467
- 536 21. Doulatov S, Hodes A, Dal L, et al. Tropism switching in Bordetella bacteriophage defines a family  
537 of diversity-generating retroelements. *Nature.* 2004;431(7007):476-481. doi:10.1038/nature02833
- 538 22. Krishnamurthy SR, Wang D. Origins and challenges of viral dark matter. *Virus Res.* 2017;239:136-  
539 142. doi:10.1016/j.virusres.2017.02.002
- 540 23. Bianciotto V, Bondi C, Minerdi D, Sironi M, Tichy H V., Bonfante P. An obligately  
541 endosymbiotic mycorrhizal fungus itself harbors obligately intracellular bacteria. *Chemtracts.*  
542 1998;11(3):206-211. doi:10.1128/aem.62.8.3005-3010.1996
- 543 24. Cole JR, Wang Q, Fish JA, et al. Ribosomal Database Project: Data and tools for high throughput  
544 rRNA analysis. *Nucleic Acids Res.* 2014;42(D1):633-642. doi:10.1093/nar/gkt1244
- 545 25. Wingett SW, Andrews S. Fastq screen: A tool for multi-genome mapping and quality control  
546 [version 1; referees: 3 approved, 1 approved with reservations]. *F1000Research.* 2018;7(0):1-12.  
547 doi:10.12688/f1000research.15931.1
- 548 26. Bolger AM, Lohse M, Usadel B. Trimmomatic: A flexible trimmer for Illumina sequence data.  
549 *Bioinformatics.* 2014;30(15):2114-2120. doi:10.1093/bioinformatics/btu170
- 550 27. Magoč T, Salzberg SL. FLASH: Fast length adjustment of short reads to improve genome  
551 assemblies. *Bioinformatics.* 2011;27(21):2957-2963. doi:10.1093/bioinformatics/btr507
- 552 28. Bankevich A, Nurk S, Antipov D, et al. SPAdes: A new genome assembly algorithm and its  
553 applications to single-cell sequencing. *J Comput Biol.* 2012;19(5):455-477.  
554 doi:10.1089/cmb.2012.0021
- 555 29. Gurevich A, Saveliev V, Vyahhi N, Tesler G. QUASt: Quality assessment tool for genome  
556 assemblies. *Bioinformatics.* 2013;29(8):1072-1075. doi:10.1093/bioinformatics/btt086
- 557 30. Seemann T. Prokka: rapid prokaryotic genome annotation. *Bioinformatics.* 2014;30(14):2068-  
558 2069. doi:10.1093/bioinformatics/btu153
- 559 31. Finn RD, Bateman A, Clements J, et al. Pfam: The protein families database. *Nucleic Acids Res.*  
560 2014;42(D1):222-230. doi:10.1093/nar/gkt1223
- 561 32. Kelley LA, Mezulis S, Yates CM, Wass MN, Sternberg MJE. The Phyre2 web portal for protein  
562 modeling, prediction and analysis. *Nat Protoc.* 2015;10(6):845-858. doi:10.1038/nprot.2015.053



- 563 33. Almagro Armenteros JJ, Tsirigos KD, Sønderby CK, et al. SignalP 5.0 improves signal peptide  
564 predictions using deep neural networks. *Nat Biotechnol.* 2019;37(4):420-423. doi:10.1038/s41587-  
565 019-0036-z
- 566 34. Lopes A, Tavares P, Petit MA, Guérois R, Zinn-Justin S. Automated classification of tailed  
567 bacteriophages according to their neck organization. *BMC Genomics.* 2014;15(1):1-17.  
568 doi:10.1186/1471-2164-15-1027
- 569 35. Sharifi F, Ye Y. MyDGR: A server for identification and characterization of diversity-generating  
570 retroelements. *Nucleic Acids Res.* 2019;47(W1):W289-W294. doi:10.1093/nar/gkz329
- 571 36. McNair K, Bailey BA, Edwards RA. PHACTS, a computational approach to classifying the  
572 lifestyle of phages. *Bioinformatics.* 2012;28(5):614-618. doi:10.1093/bioinformatics/bts014
- 573 37. Bolduc B, Jang H Bin, Doulier G, You Z, Roux S, Sullivan MB. vConTACT : an iVirus tool to  
574 classify double-stranded DNA viruses that infect Archaea and Bacteria. 2017:1-26.  
575 doi:10.7717/peerj.3243
- 576 38. Larkin MA, Blackshields G, Brown NP, et al. Clustal W and Clustal X version 2.0. *Bioinformatics.*  
577 2007;23(21):2947-2948. doi:10.1093/bioinformatics/btm404
- 578 39. Gouy M, Guindon S, Gascuel O. SeaView version 4: A multiplatform graphical user interface for  
579 sequence alignment and phylogenetic tree building. *Mol Biol Evol.* 2010;27(2):221-224.  
580 doi:10.1093/molbev/msp259
- 581 40. Carver T, Berriman M, Tivey A, et al. Artemis and ACT: viewing, annotating and comparing  
582 sequences stored in a relational database. *Bioinformatics.* 2008;24(23):2672-2676.  
583 doi:10.1093/bioinformatics/btn529
- 584 41. Sullivan MJ, Petty NK, Beatson SA. Easyfig: a genome comparison visualizer. *Bioinformatics.*  
585 2011;27(7):1009-1010. doi:10.1093/bioinformatics/btr039
- 586 42. Bushnell B, Rood J, Singer E. BBMerge – Accurate paired shotgun read merging via overlap.  
587 *PLoS One.* 2017;12(10):e0185056. <https://doi.org/10.1371/journal.pone.0185056>.
- 588 43. Li H, Handsaker B, Wysoker A, et al. The Sequence Alignment/Map format and SAMtools.  
589 *Bioinformatics.* 2009;25(16):2078-2079. doi:10.1093/bioinformatics/btp352
- 590 44. Lorenz Christian Reimer, Anna Vetcinova, Joaquim Sardà Carbasse, Carola Söhngen, Dorothea  
591 Gleim, Christian Ebeling, Jörg Overmann, BacDive in 2019: bacterial phenotypic data for High-  
592 throughput biodiversity analysis, *Nucleic Acids Research*, Volume 47, Issue D1, 08 January 2019,  
593 Pages D631–D636, <https://doi.org/10.1093/nar/gky879>; *Bacteroides uniformis*. *Definitions.* 2020.  
594 doi:10.32388/9nem1h
- 595 45. Leplae R, Lima-Mendez G, Toussaint A. ACLAME: A CLAssification of mobile genetic elements,  
596 update 2010. *Nucleic Acids Res.* 2009;38(SUPPL.1):57-61. doi:10.1093/nar/gkp938
- 597 46. Belcaid M, Bergeron A, Poisson G. The evolution of the tape measure protein: Units, duplications  
598 and losses. *BMC Bioinformatics.* 2011;12(SUPPL. 9):S10. doi:10.1186/1471-2105-12-S9-S10
- 599 47. Weinberg Z, Lünse CE, Corbino KA, et al. Detection of 224 candidate structured RNAs by  
600 Comparative analysis of specific subsets of intergenic regions. *Nucleic Acids Res.*  
601 2017;45(18):10811-10823. doi:10.1093/nar/gkx699
- 602 48. Arambula D, Wong W, Medhekar BA, et al. Surface display of a massively variable lipoprotein by  
603 a legionella diversity-generating retroelement. *Proc Natl Acad Sci U S A.* 2013;110(20):8212-8217.

- 604 doi:10.1073/pnas.1301366110
- 605 49. Xu Q, Shoji M, Shibata S, et al. A Distinct Type of Pilus from the Human Microbiome. *Cell*.  
606 2016;165(3):690-703. doi:10.1016/j.cell.2016.03.016
- 607 50. Ye Y. Identification of diversity-generating retroelements in human microbiomes. *Int J Mol Sci*.  
608 2014;15(8):14234-14246. doi:10.3390/ijms150814234
- 609 51. Goodacre N, Aljanahi A, Nandakumar S, Mikailov M, Khan AS. A Reference Viral Database  
610 (RVDB) To Enhance Bioinformatics Analysis of High-Throughput Sequencing for Novel Virus  
611 Detection. *mSphere*. 2018;3(2):1-18. doi:10.1128/mspheredirect.00069-18
- 612 52. Gregory AC, Zablocki O, Howell A, Bolduc B, Sullivan MB. The human gut virome database.  
613 *bioRxiv*. January 2019:655910. doi:10.1101/655910
- 614 53. Rampelli S, Turrone S, Schnorr SL, et al. Characterization of the human DNA gut virome across  
615 populations with different subsistence strategies and geographical origin. *Environ Microbiol*.  
616 2017;19(11):4728-4735. doi:10.1111/1462-2920.13938
- 617 54. Yinda CK, Vanhulle E, Conceição-Neto N, et al. Gut Virome Analysis of Cameroonians Reveals  
618 High Diversity of Enteric Viruses, Including Potential Interspecies Transmitted Viruses. Roossinck  
619 MJ, ed. *mSphere*. 2019;4(1):e00585-18. doi:10.1128/mSphere.00585-18
- 620 55. Den Besten G, Van Eunen K, Groen AK, Venema K, Reijngoud DJ, Bakker BM. The role of short-  
621 chain fatty acids in the interplay between diet, gut microbiota, and host energy metabolism. *J Lipid*  
622 *Res*. 2013;54(9):2325-2340. doi:10.1194/jlr.R036012
- 623 56. Wu GD, Chen J, Hoffmann C, et al. Linking long-term dietary patterns with gut microbial  
624 enterotypes. *Science (80- )*. 2011;334(6052):105-108. doi:10.1126/science.1208344
- 625 57. Arumugam M, Raes J, Pelletier E, et al. Enterotypes of the human gut microbiome. *Nature*.  
626 2011;473(7346):174-180. doi:10.1038/nature09944
- 627 58. Arumugam M, Raes J, Pelletier E, et al. Enterotypes in the landscape of gut microbial community  
628 composition. *Nature*. 2013;3(1):1-12. doi:10.1038/nature09944. Enterotypes
- 629 59. Mahnic A, Id MR. Different host factors are associated with patterns in bacterial and fungal gut  
630 microbiota in Slovenian healthy cohort. 2018:1-17.
- 631 60. Qin J, Li R, Raes J, et al. A human gut microbial gene catalogue established by metagenomic  
632 sequencing. *Nature*. 2010;464(7285):59-65. doi:10.1038/nature08821
- 633 61. Cieplak T, Soffer N, Sulakvelidze A, Sandris D. A bacteriophage cocktail targeting *Escherichia*  
634 *coli* reduces *E. coli* in simulated gut conditions, while preserving a non-targeted representative  
635 commensal normal microbiota. *Gut Microbes*. 2018;0(0):1-9.  
636 doi:10.1080/19490976.2018.1447291
- 637 62. Dalmaso M, Strain R, Neve H, et al. Three new *Escherichia coli* phages from the human gut show  
638 promising potential for phage therapy. *PLoS One*. 2016;11(6):1-16.  
639 doi:10.1371/journal.pone.0156773
- 640 63. Krylov V, Shaburova O, Krylov S, Pleteneva E. A genetic approach to the development of new  
641 therapeutic phages to fight *Pseudomonas aeruginosa* in wound infections. *Viruses*. 2012;5(1):15-  
642 53. doi:10.3390/v5010015
- 643 64. Mills S, Hill C, Coffey A. Movers and shakers : Influence of bacteriophages in shaping the  
644 mammalian gut microbiota Movers and shakers Influence of bacteriophages in shaping the

- 645 mammalian gut microbiota. 2013;(December 2015). doi:10.4161/gutm.22371
- 646 65. Tetz G V., Ruggles K V., Zhou H, Heguy A, Tsirigos A, Tetz V. Bacteriophages as potential new  
647 mammalian pathogens. *Sci Rep.* 2017;7(1):1-9. doi:10.1038/s41598-017-07278-6
- 648

649 **Tables**  
650

Table 1. Comparison of general characteristics of isolated phages belonging to a newly defined genus Bacuni.

| Phage                                | F1                                      | F2                                                | F3 and F4                                   |
|--------------------------------------|-----------------------------------------|---------------------------------------------------|---------------------------------------------|
| Bacterial host                       | <i>Bacteroides uniformis</i><br>MB18-33 | <i>Bacteroides uniformis</i><br>MB18-33           | <i>Bacteroides uniformis</i><br>MB18-80     |
| No. of predicted ORFs                | 51                                      | 51                                                | 50                                          |
| Assembled genome length (bp)         | 40421                                   | 40653                                             | 40640                                       |
| G+C content (%)                      | 51.8                                    | 51.7                                              | 51.7                                        |
| Genetic differences (compared to F1) | Reference                               | 16 SNPs in the DGR and 19 aa insertion in RT gene | 24 SNPs, 18 in DGR<br>RT identical to RT F1 |

(RT – reverse transcriptase, VR – variable repeat, aa – amino acids, SNP – single nucleotide polymorphism, ORF – open reading frame; DGR: Diversity-generating retroelements)

Table 2. Comparison of selected genome characteristics between Bacuni phages and putative partially homologous prophage genomes

| Host strain                                      | Source                                | Collection date and location  | Region length (bp) | No. of Bacuni homologous proteins / No. of ORFs | Coverage (%) - nt identity (%) * | Genome location and biosample accession                                          |
|--------------------------------------------------|---------------------------------------|-------------------------------|--------------------|-------------------------------------------------|----------------------------------|----------------------------------------------------------------------------------|
| <i>Bacteroides acidifaciens</i> NM70_E10         | <i>Mus musculus</i> , colon and cecum | 2016, Toronto, Canada         | 44986              | 28 / 48                                         | 45%<br>-<br>71.06%               | Node 8<br>(64227 ... 109212)<br><br>SAMN10878312                                 |
| <i>Prevotella</i> sp. P3-122                     | <i>Sus scrofa domestica</i> , feces   | 2014, Slovenia: pig farm Ihan | 34280              | Contig 46: 21 / 35,<br>Contig 76: 5 / 15        | 46%<br>-<br>72.82%               | Contig 46<br>(44340 ... 78619)<br>Contig 76<br>(1 ... 12007)<br><br>SAMN07431220 |
| <i>Prevotella</i> sp. OH937_COT-195              | <i>Canis lupus</i> , dog mouth        | 2012, Leicestershire, UK      | 38640              | 17 / 47                                         | 28%<br>-<br>71.82%               | Scaffold20<br>(3163 ... 37390)<br><br>SAMN10478691                               |
| <i>Porphyromonas gingivicanis</i> COT-022 OH1391 | <i>Canis lupus</i> , dog mouth        | 2012, Leicestershire, UK      | 35922              | 11 / 39                                         | 23%<br>-<br>70.63%               | Contig 6<br>(16379 ... 52300)<br><br>SAMN03004338                                |
| <i>Porphyromonas cangingivalis</i> JCM 15983     | n.a.                                  | 2014, The University of Tokyo | 33481              | 17 / 46                                         | 33%<br>-<br>67.78%               | Node 1<br>(3106 ... 36586)<br><br>SAMD00003336                                   |
| <i>Prevotella timonensis</i> UMB0818             | <i>Homo sapiens</i> , catheter        | 2015, USA: Maywood, IL        | 37867              | 16 / 47                                         | 4%<br>-<br>69.19%                | Node 1<br>(56177 ... 94272)<br><br>SAMN07511428                                  |

\*Genome coverage ~ Percent of nucleotide identity (discontiguous megablast) compared to F1

Table 3. Genetic differences in biologically relevant genes of Bacuni phage F4 host MB18-80 and its derivatives that are immune to infection with Bacuni phages or indicate tropism switching pattern.

| Putative function of <i>B. uniformis</i> MB18-80 protein       | NCBI accession* of closest BLASTp hit                                   | SNP in <i>B. uniformis</i> MB18-80 K (immune) | SNP in <i>B. uniformis</i> MB18-80 PH (switched tropism) |
|----------------------------------------------------------------|-------------------------------------------------------------------------|-----------------------------------------------|----------------------------------------------------------|
| Type I restriction-modification system specificity (S) subunit | WP_117795664.1,<br>WP_118086673.1                                       | +                                             | +                                                        |
| TonB-linked outer membrane protein, SusC receptor              | EOS06643.1,<br>WP_080597360.1                                           | +                                             | -                                                        |
| Outer-membrane protein OmpA, DUF5082                           | WP_034528676.1,<br>WP_034528679.1                                       | -                                             | +                                                        |
| Putative porin – exopolysaccharide biosynthesis protein YbjH   | WP_034528957.1,<br>WP_120141442.1,<br>WP_147392574.1,<br>WP_147392573.1 | -                                             | +                                                        |

\*BLASTp coverage range from 96% to 100%, identity from 99.5% to 100%

652

653

654 **Figure legend:**

655  
656 Figure 1. Lytic Bacuni phages exhibit *Siphoviridae* morphology. (a) Photograph of Bacuni virion  
657 obtained by transmission electronic microscopy (scale bar is 100 nm). (b) Plaque morphology of  
658 Bacuni phage F1 formed on *B. uniformis* MB18-33 host lawn after 24 hours incubation in sABB  
659 agar overlay. (c) Lysis like zones formed on sABB agar overlay after 24 incubation with host  
660 strain *Bacteroides vulgatus* MB18-32 in double layer agar overlay (spot assay with enrichment  
661 sample).

662 Figure 2. Linear genome map of Bacuni phage F1. Colors of open reading frames correspond to  
663 the general predicted functions (see color legend for details). Genes with no functional  
664 annotations (hypothetical proteins) are not labeled. Locations of template sequence (TR) and  
665 variable repeats of diversity-generating retroelement (DGR) are marked with orange and red  
666 rectangles above associated proteins.

667 Figure 3. Alignment of the TRs and VRs from isolated Bacuni phages. Each nucleotide base is  
668 color-coded for visualization of mismatches in the variable repeat. VR2, located in the close  
669 proximity of reverse transcriptase represent the region with highest condensation of SNP sites,  
670 which most likely influence Bacuni phage host range.

671 Figure 4. Comparison of genome organization and genomic synteny of Bacuni phages to putative  
672 prophage genomes in various bacterial hosts from *Bacteroidales*. BLASTp sequence homology  
673 (40 % similarity and higher) between Bacuni phage F1 and related prophage regions identified in  
674 genomes of *B. acidifaciens*, *Prevotella* sp., *P. gingivicanis* and *P. cangingivalis* (see Table 2 for  
675 more information) is indicated with a color link. Colors of putative proteins correspond with the  
676 general predicted functions (see color legend).





678 **Supplemental Material**

679 Data set S1

680 List of *Bacteroides* strains, isolated from stool sample and associated phage screening and host  
681 range experiments.

682 Data set S2 (A) and Figure S1 (B)

683 Taxonomic analysis conducted with vConTACT2<sup>37</sup> shows that isolated phages could not be  
684 assigned to any of the known prokaryotic viral clusters. Supplemental file S2 contains the  
685 Cytoscape network file (B) and the data set (A) with viral clusters made by vConTACT2. In the  
686 file the phage F1 is named 3P11 and the phage F4 8POS.

687 Figure S2

688 Classification of the Bacuni phage F1 with respect to other related phages in Aclame (Bacuni  
689 phage F1 in text box with red border and white background). According to Virfam server  
690 generated protein identification of the phage head-neck-tail module, Bacuni F1 clusters into  
691 *Siphoviridae* of the neck type 1, cluster 3 within the phages in the database ACLAME. The  
692 conserved genome organization observed among the phages of the ACLAME database was used  
693 to define allowed inter-gene distance intervals<sup>34</sup>. Each cluster with associated number represents  
694 a different neck type.

695 Data set S3

696 Putative functions of identified ORFs of Bacuni phages and their closest BLAST hits. Functional  
697 annotations for each Bacuni F1 predicted ORF. Function were determined by comparisons to the  
698 conserved domain database, Pfam, Phyre2, Virfam and MyDGR. For each ORF best BLASTp hit

699 accession with the corresponding e-value, query coverage and percent identity is listed. Predicted  
700 signal peptides and transmembrane domains are included.

701 Figure S3

702 Phylogenetic analysis of terminase large subunit (TerL) generated with phyML using the  
703 maximum likelihood approach and GTR nucleotide substitution model. Bacuni phage TerL  
704 clusters into the group of phages with cohesive ends and 3'-single-strand extensions

705 Data set S4

706 The putative functions of ORFs encoded in 6 identified prophages that share homologous  
707 proteins with Bacuni phages. Functions were determined by comparisons to the conserved  
708 domain database, Pfam, Phyre2, Virfam and MyDGR. For each ORF best BLASTp hit accession  
709 with the corresponding e-value is listed

710 Data set S5

711 Number of aligned reads mapping to Bacuni phage F1 in human gut derived metagenomics data  
712 sets. The Bacuni phage F1 genome was used as a reference to align reads from whole-community  
713 metagenomes using BBtools.

714 Figure S4

715 Schematic methodologic overview of lysogenic assay conducted to explore Bacuni phage host  
716 range.

717 Data set S6

718 Genetic differences in biologically relevant genes of Bacuni phage F4 host MB18-80 and its  
719 derivatives that are immune to infection with Bacuni phages or switched host tropism. Genome  
720 location of genes with SNPs and their closest blastp hit accession numbers are provided.

721

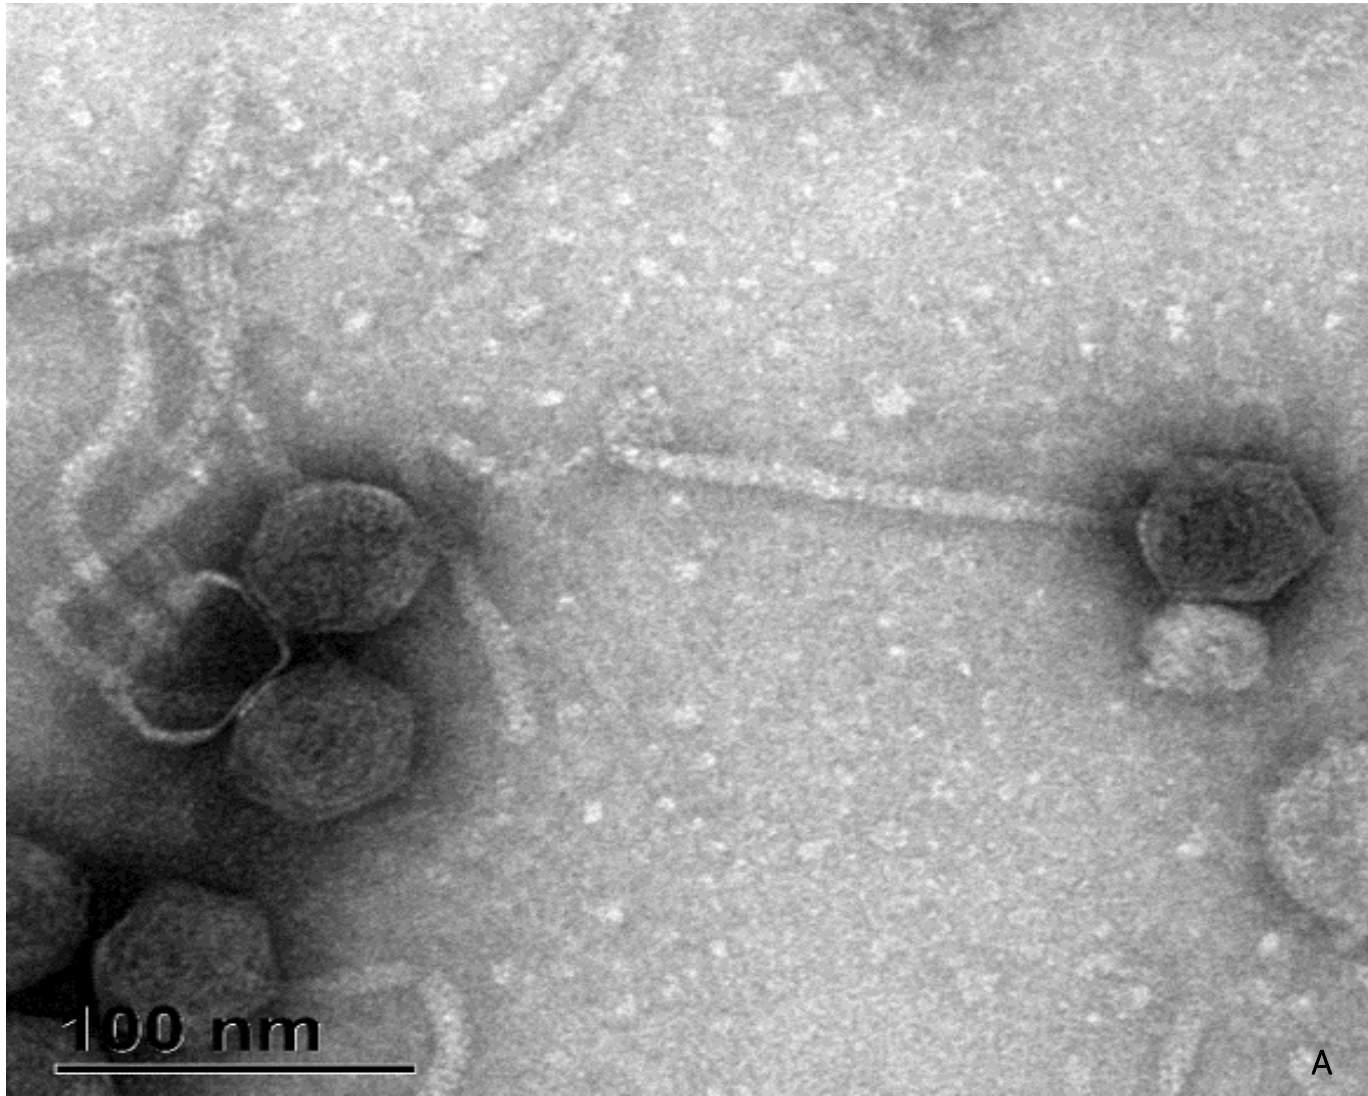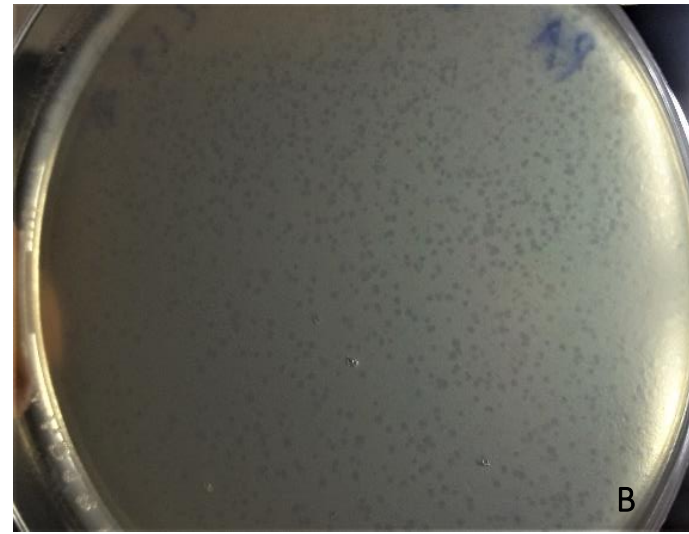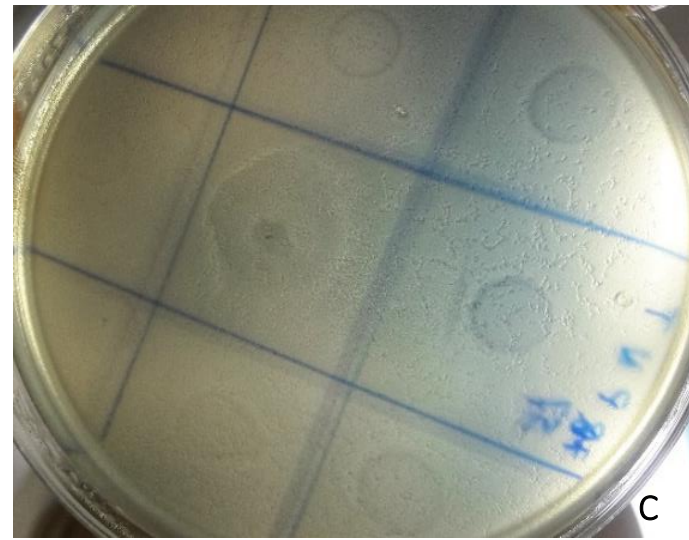

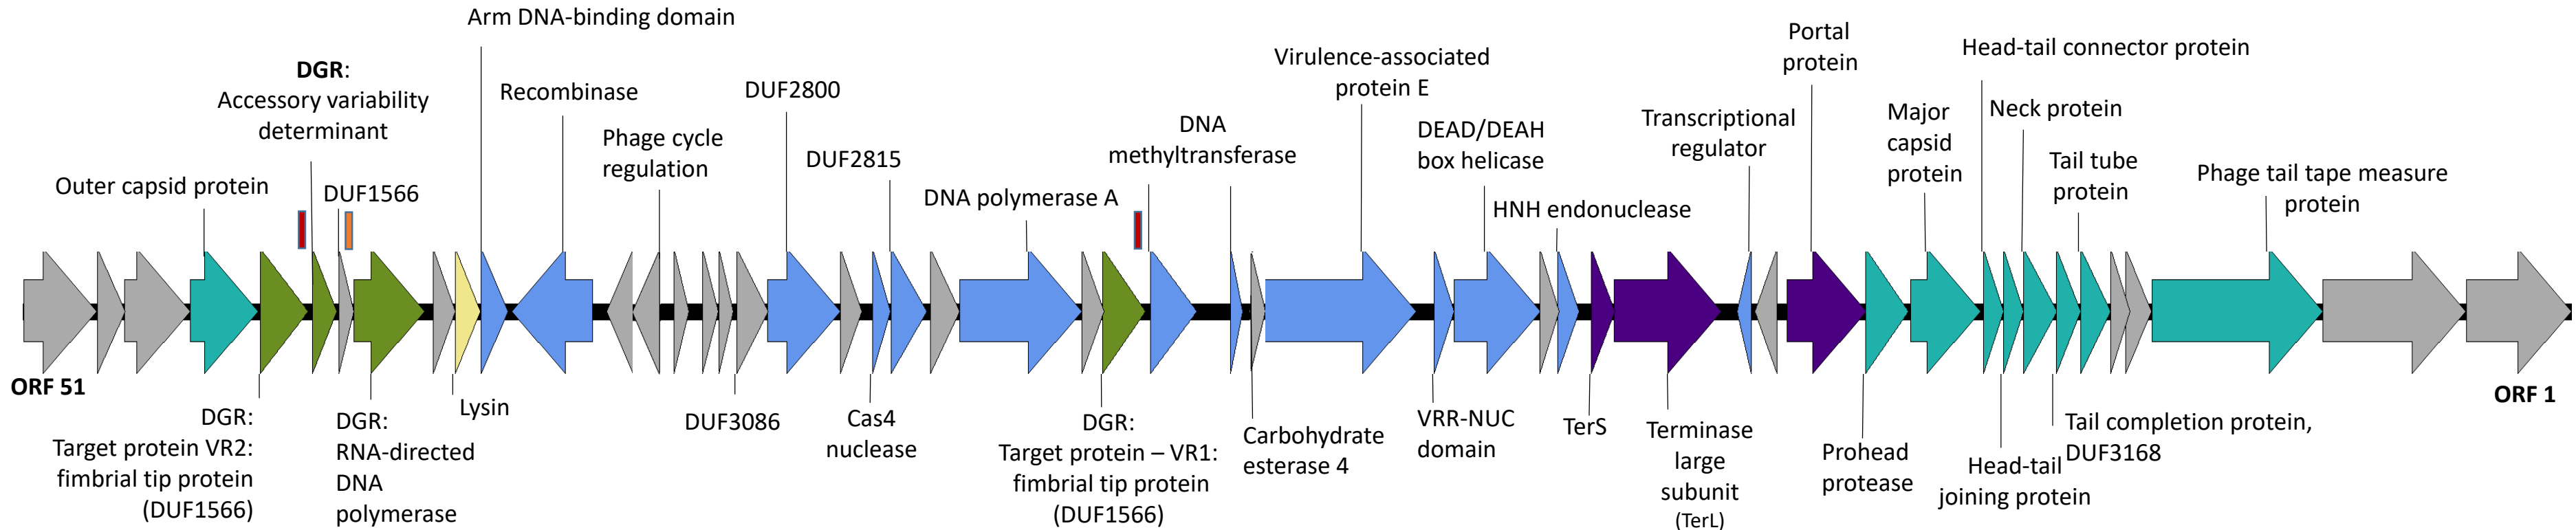

VR – variable repeat (DGR)

TR – template repeat (DGR)

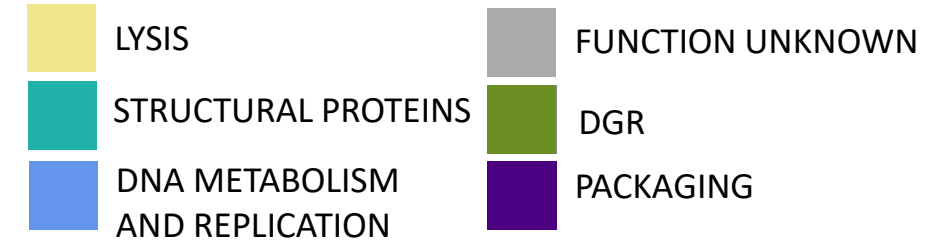



TARGET REPEAT

F1\_TR GAGTACAGCGCGACC AACCGCGTGGAA TTGAACTCAAC AACGGC AACGCGAAC AACCAACTAAGGC GACGAA CACGAA CAGAG TTCGCCCG TTTCAGCA CTTT  
F2\_TR GAGTACAGCGCGACC AACCGCGTGGAA TTGAACTCAAC AACGGC AACGCGAAC AACCAACTAAGGC GACGAA CACGAA CAGAG TTCGCCCG TTTCAGCA CTTT  
F4\_TR GAGTACAGCGCGACC AACCGCGTGGAA TTGAACTCAAC AACGGC AACGCGAAC AACCAACTAAGGC GACGAA CACGAA CAGAG TTCGCCCG TTTCAGCA CTTT

VARIABLE REPEATS

F1\_VR\_1 GAGTACAGCGCGGCCGACGCGTGGTATTTGTACCTCTACAGCGGCAGCGCGCGCAGCCTCACTAAGGC GACGAGCACGAACAGAG TTCGCCCG TTT CAGCA TTTT  
F2\_VR\_1 GAGTACAGCGCGCCCGACGCGTGGTATTTGTACCTCTACAGCGGCAGCGCGCGCAGCCTCACTAAGGC GACGAGCACGAACAGAG TTCGCCCG TTT CAGCA TTTT  
F4\_VR\_1 GAGTACAGCGCGACCTACGCGTGGTATTTGGGCCCAAC AACGGC GCGGCGGTACTACACC ACTAAGGC GACGACCACGCCAGCA TTCGCCCG TTT CAGCA TTTT  
  
F1\_VR\_2 GAGTCCAGCGCGACCCCTCGCGTGGTATTTGAACTCTACAGCGGC TACGCGAAC TACGGCGCTGAGGC GACGGGCACGGGCAGAG TTCGCCCG TTT CAGCA TTTT  
F2\_VR\_2 GAGTACAGCGCTACCGCCGCGTGGTATTTGTACCTCTACAGCGGC GACGCGTAC AACGGC ACTAAGGC GACGAA CACGA C CAGAG TTCGCCCG TTT CAGCA TTTT  
F4\_VR\_2 GAGTCCAGCGCGACCCCTCGCGTGGTATTTGAACTCTACAGCGGC TACGCGAAC TACGGCGCTGAGGC GACGGGCACGGGCAGAG TTCGCCCG TTT CAGCA TTTT

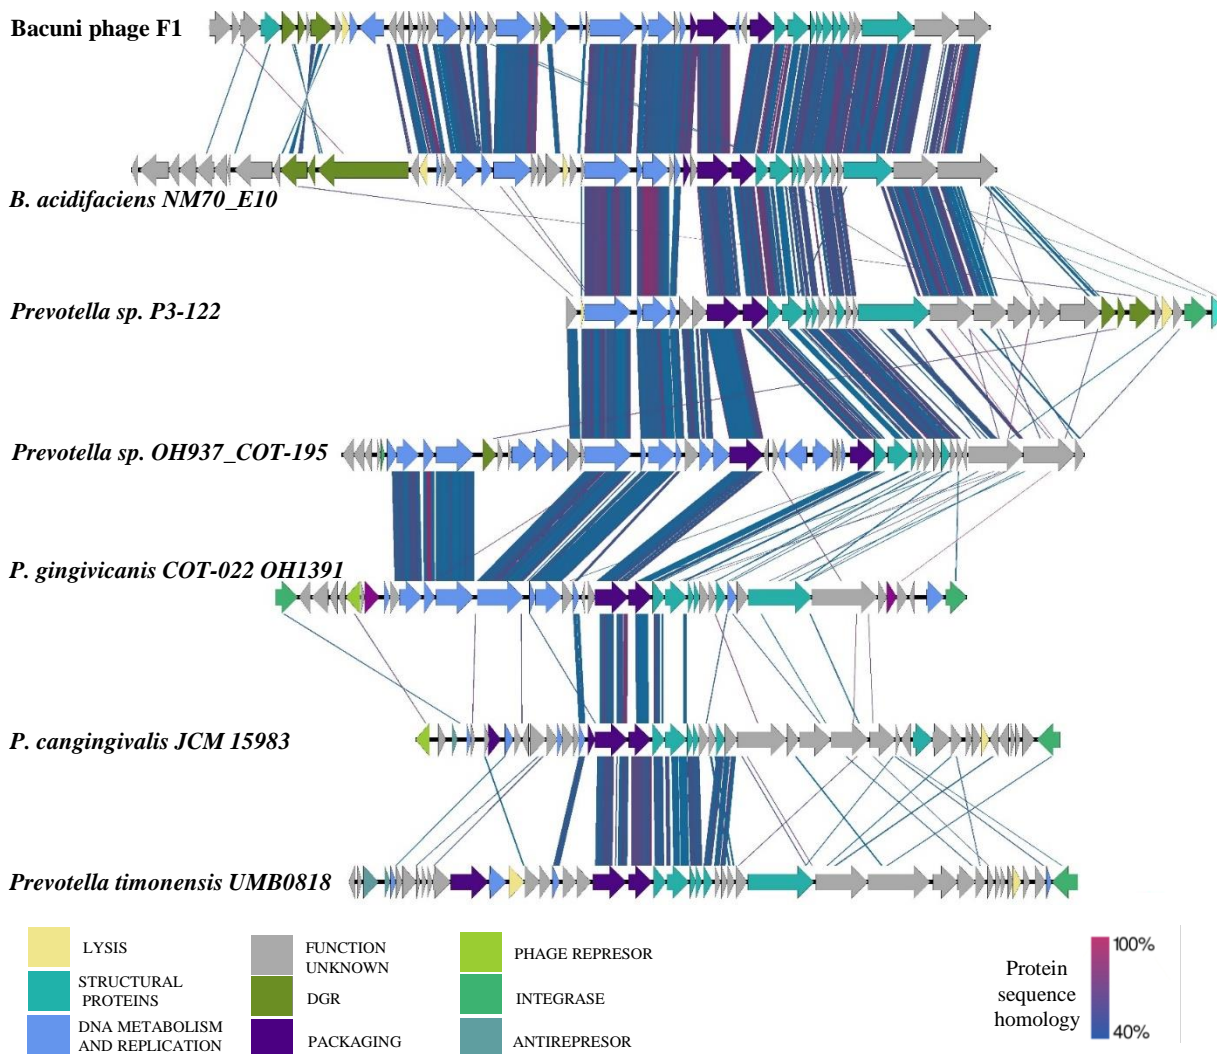

Source: https://biorxiv.org/content/10.1101/2020.10.09.334284v1.full.pdf
